# Supplementary material for: Recent Selective Sweeps in North American Drosophila melanogaster Show Signatures of Soft Sweeps
Source: PubMed Central journal article supplement (PMC4338236; doi:10.1371/journal.pgen.1005004), 2015-02-23
Supplement: pgen.1005004.s013.pdf [file pgen.1005004.s013.pdf]

**S1 Table. Parameter values used for simulations of admixture models from Fig. 1.** Point estimates were calculated by Pablo Duchon (personal communication). All population sizes are in units of  $N_{Ac}$ . In the admixture model (A),  $N_{Ac}=4,975,360$ , and in the admixture with bottleneck model (B),  $N_{Ac}=3,100,520$ . All times are in units  $4N_{Ac}$ .

**A) Admixture model**

| <b>Parameter</b>                 | <b>Symbol</b> | <b>Value</b> |
|----------------------------------|---------------|--------------|
| Ancient size Africa              | $N_{Aa}$      | 1.049994     |
| Time of bottleneck Africa        | $T_A$         | 0.1192512    |
| Severity of bottleneck Africa    | $sev_A$       | 0.21         |
| Current size Africa              | $N_{Ac}$      | 1            |
| Time of admixture                | $T_{adm}$     | 7.263e-05    |
| Proportion of European admixture | $prop_{adm}$  | 0.85         |
| Time of split Africa-Europe      | $T_{AE}$      | 0.009798     |
| Ancient size North America       | $N_{Na}$      | 0.0005048653 |
| Current size North America       | $N_{Nc}$      | 3.2127       |
| Ancient size Europe              | $N_{Ea}$      | 0.003413308  |
| Current size Europe              | $N_{Ec}$      | 0.6276       |

**B) Admixture with bottleneck model**

| <b>Parameter</b>                 | <b>Symbol</b> | <b>Value</b> |
|----------------------------------|---------------|--------------|
| Ancient size Africa              | $N_{Aa}$      | 1.0401       |
| Time of bottleneck Africa        | $T_A$         | 0.03241136   |
| Severity of bottleneck Africa    | $sev_A$       | 0.615123     |
| Current size Africa              | $N_{Ac}$      | 1            |
| Time of admixture                | $T_{adm}$     | 3.757037e-05 |
| Proportion of European admixture | $prop_{adm}$  | 0.871794     |
| Time of split Africa-Europe      | $T_{AE}$      | 0.006037894  |
| Current size North America       | $N_{Nc}$      | 2.968357     |
| Ancient size Europe              | $N_{Ea}$      | 0.004306807  |
| Current size Europe              | $N_{Ec}$      | 0.7318321    |
