# Supplementary material for: Recent Selective Sweeps in North American Drosophila melanogaster Show Signatures of Soft Sweeps
Source: PubMed Central journal article supplement (PMC4338236; doi:10.1371/journal.pgen.1005004), 2015-02-23
Supplement: pgen.1005004.s014.pdf [file pgen.1005004.s014.pdf]

**S2 Table. Demographic parameters inferred by DaDi for simple bottleneck scenarios.**

Shown are parameter estimates for six simple bottleneck scenarios fit to short intron data in DGRP inferred by DaDi [47] and the corresponding log likelihoods for each model (LL). For all inferred models, the bottleneck sizes ( $N_B$ ) were fixed at values as specified in the table. All population size estimates are in terms of units  $4*Ne_{ancestral}$ , and all time estimates are in terms of units  $2*Ne_{ancestral}$ . Values of  $\theta_{exp}$  were measured for each inferred demographic models and are a function of the number of base pairs (738,024) used to generate the SFS. Note that  $N_B=0.002$  represents the population size of the bottleneck inferred by Li and Stephan (2006) [64] and  $N_B=0.029$  is the population size of the bottleneck inferred by Thornton and Andolfatto (2006) [46]. We ultimately chose to use the short severe bottleneck model ( $N_B=0.002$ ,  $T_B=0.0002$ ) and shallow long bottleneck model ( $N_B=0.4$ ,  $T_B=0.0560$ ) because all models fit the data equally well and these two models represent the extreme ends of the range of models tested. See S3 Table for a comparison of the fit of the severe short and shallow long bottleneck models to short intron data in terms of  $S$  and  $\pi$ .

| $N_B$ | $N_F$ | $T_B$  | $T_F$ | LL      | $\theta_{exp}$ |
|-------|-------|--------|-------|---------|----------------|
| 0.002 | 0.601 | 0.0002 | 0.33  | -285.77 | 10023.95       |
| 0.029 | 0.683 | 0.0021 | 0.18  | -285.67 | 11337.58       |
| 0.05  | 0.682 | 0.0037 | 0.18  | -285.67 | 10024.82       |
| 0.1   | 0.682 | 0.0080 | 0.18  | -285.67 | 10027.46       |
| 0.2   | 0.682 | 0.0186 | 0.18  | -285.67 | 10034.67       |
| 0.4   | 0.679 | 0.0560 | 0.16  | -285.68 | 10069.48       |
