# Supplementary material for: Recent Selective Sweeps in North American Drosophila melanogaster Show Signatures of Soft Sweeps
Source: PubMed Central journal article supplement (PMC4338236; doi:10.1371/journal.pgen.1005004), 2015-02-23
Supplement: pgen.1005004.s015.pdf [file pgen.1005004.s015.pdf]

**S3 Table.  $S$  and  $\pi$  measured in neutral demographic models of North American**

**Drosophila.** Estimates of  $S$  and  $\pi$  were averaged over 30,000 simulations of 10,000 bps for each demographic model.  $S$  and  $\pi$  estimates in DGRP short intron data were measured to be 5.8% and 1.2% per bp, respectively.

| <b>Demographic model</b>       | <b><math>S</math>/bp</b> | <b><math>\pi</math>/bp</b> |
|--------------------------------|--------------------------|----------------------------|
| Admixture                      | 5.8%                     | 1.1%                       |
| Admixture + bottleneck         | 5.6%                     | 1.3%                       |
| Constant $N_e=10^6$            | 2.3%                     | 0.4%                       |
| Constant $N_e=2.7 \times 10^6$ | 5.8%                     | 1.1%                       |
| Severe short bottleneck        | 5.7%                     | 1.1%                       |
| Shallow long bottleneck        | 5.5%                     | 1.1%                       |
