# Supplementary material for: Recent Selective Sweeps in North American Drosophila melanogaster Show Signatures of Soft Sweeps
Source: PubMed Central journal article supplement (PMC4338236; doi:10.1371/journal.pgen.1005004), 2015-02-23
Supplement: pgen.1005004.s018.pdf [file pgen.1005004.s018.pdf]

| <b>Chr</b> | <b>Position</b> | <b>ChiSqVal</b> | <b>Df</b> | <b>p-value</b> |
|------------|-----------------|-----------------|-----------|----------------|
| Chr2R      | 8097727         | 21.87           | 24        | 0.587          |
| Chr3R      | 21164799        | 19.86           | 54        | 1.000          |
| Chr3R      | 9060820         | 54.57           | 54        | 0.453          |
| Chr2L      | 14284048        | 12.92           | 18        | 0.796          |
| Chr3R      | 7510750         | 42.92           | 54        | 0.861          |
| Chr2R      | 5556786         | 41.63           | 32        | 0.119          |
| Chr2L      | 8946009         | 8.20            | 15        | 0.916          |
| Chr3R      | 17569877        | 34.75           | 66        | 0.999          |
| Chr3R      | 16938688        | 22.79           | 72        | 1.000          |
| Chr2L      | 18132779        | 19.82           | 22        | 0.594          |
| Chr2R      | 19764552        | 19.46           | 32        | 0.960          |
| Chr2R      | 2043155         | 17.29           | 36        | 0.996          |
| Chr3R      | 6766917         | 47.40           | 57        | 0.814          |
| Chr3R      | 26334451        | 42.64           | 54        | 0.868          |
| Chr2R      | 6196252         | 8.47            | 46        | 1.000          |
| Chr2L      | 18196971        | 13.44           | 17        | 0.706          |
| Chr3R      | 7892320         | 34.23           | 57        | 0.993          |
| Chr3R      | 26036261        | 50.56           | 75        | 0.986          |
| Chr3R      | 18175477        | 67.60           | 57        | 0.159          |
| Chr2R      | 18097586        | 12.03           | 34        | 1.000          |
| Chr3R      | 24353929        | 19.86           | 63        | 1.000          |
| Chr2R      | 5735958         | 14.76           | 44        | 1.000          |
| Chr2L      | 20088273        | 14.56           | 23        | 0.910          |
| Chr3R      | 17917391        | 46.48           | 63        | 0.941          |
| Chr2R      | 18779397        | 20.68           | 42        | 0.998          |
| Chr2R      | 18723092        | 32.25           | 58        | 0.998          |
| Chr2L      | 9543046         | 14.60           | 21        | 0.842          |
| Chr3R      | 11057699        | 41.41           | 63        | 0.984          |
| Chr3R      | 26932837        | 50.68           | 75        | 0.986          |
| Chr2R      | 13587388        | 11.86           | 34        | 1.000          |
| Chr3L      | 3379750         | 7.26            | 18        | 0.988          |
| Chr3R      | 15339462        | 65.51           | 69        | 0.597          |
| Chr3R      | 18556910        | 42.90           | 45        | 0.561          |
| Chr2L      | 14851029        | 8.85            | 20        | 0.985          |
| Chr3R      | 15864238        | 15.20           | 57        | 1.000          |
| Chr2L      | 8317289         | 12.89           | 23        | 0.954          |
| Chr3R      | 8471637         | 56.62           | 69        | 0.857          |
| Chr3R      | 27035947        | 57.29           | 75        | 0.936          |
| Chr3R      | 6517364         | 21.12           | 69        | 1.000          |
| Chr3R      | 17868544        | 24.18           | 54        | 1.000          |
| Chr3R      | 26272089        | 45.50           | 60        | 0.917          |
| Chr2R      | 2453765         | 14.25           | 34        | 0.999          |
| Chr2R      | 6101046         | 139.46          | 48        | 0.000          |
| Chr3R      | 13245371        | 73.64           | 72        | 0.424          |
| Chr2R      | 10140367        | 10.13           | 40        | 1.000          |
| Chr2L      | 4156488         | 15.46           | 18        | 0.630          |
| Chr3R      | 15434756        | 30.14           | 75        | 1.000          |
| Chr3R      | 14491226        | 34.20           | 63        | 0.999          |
| Chr3L      | 2243951         | 35.78           | 25        | 0.075          |
| Chr3R      | 5814615         | 16.85           | 51        | 1.000          |
